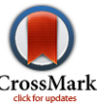

# Capsaicin Cough Sensitivity and the Association with Clinical Parameters in Bronchiectasis

Wei-jie Guan<sup>1</sup>\*, Yong-hua Gao<sup>2</sup>\*, Gang Xu<sup>3</sup>\*, Zhi-ya Lin<sup>1</sup>, Yan Tang<sup>1</sup>, Hui-min Li<sup>1</sup>, Zhi-min Lin<sup>1</sup>, Jin-ping Zheng<sup>1</sup>, Rong-chang Chen<sup>1\*</sup>, Nan-shan Zhong<sup>1\*</sup>

**1** State Key Laboratory of Respiratory Disease, National Clinical Research Center for Respiratory Disease, Guangzhou Institute of Respiratory Disease, First Affiliated Hospital of Guangzhou Medical University, Guangzhou, Guangdong, China, **2** Department of Respiratory and Critical Care Medicine, First Affiliated Hospital of Zhengzhou University, Zhengzhou, Henan, China, **3** Guangzhou First People's Hospital, Guangzhou, Guangdong, China

## Abstract

**Background:** Cough hypersensitivity has been common among respiratory diseases.

**Objective:** To determine associations of capsaicin cough sensitivity and clinical parameters in adults with clinically stable bronchiectasis.

**Methods:** We recruited 135 consecutive adult bronchiectasis patients and 22 healthy subjects. History inquiry, sputum culture, spirometry, chest high-resolution computed tomography (HRCT), Leicester Cough Questionnaire scoring, Bronchiectasis Severity Index (BSI) assessment and capsaicin inhalation challenge were performed. Cough sensitivity was measured as the capsaicin concentration eliciting at least 2 ( $C_2$ ) and 5 coughs ( $C_5$ ).

**Results:** Despite significant overlap between healthy subjects and bronchiectasis patients, both  $C_2$  and  $C_5$  were significantly lower in the latter group (all  $P < 0.01$ ). Lower levels of  $C_5$  were associated with a longer duration of bronchiectasis symptoms, worse HRCT score, higher 24-hour sputum volume, BSI and sputum purulence score, and sputum culture positive for *P. aeruginosa*. Determinants associated with increased capsaicin cough sensitivity, defined as  $C_5$  being  $62.5 \mu\text{mol/L}$  or less, encompassed female gender (OR: 3.25, 95%CI: 1.35–7.83,  $P < 0.01$ ), HRCT total score between 7–12 (OR: 2.57, 95%CI: 1.07–6.173,  $P = 0.04$ ), BSI between 5–8 (OR: 4.05, 95%CI: 1.48–11.06,  $P < 0.01$ ) and 9 or greater (OR: 4.38, 95%CI: 1.48–12.93,  $P < 0.01$ ).

**Conclusion:** Capsaicin cough sensitivity is heightened in a subgroup of bronchiectasis patients and associated with the disease severity. Gender and disease severity, but not sputum purulence, are independent determinants of heightened capsaicin cough sensitivity. Current testing for cough sensitivity diagnosis may be limited because of overlap with healthy subjects but might provide an objective index for assessment of cough in future clinical trials.

**Citation:** Guan W-j, Gao Y-h, Xu G, Lin Z-y, Tang Y, et al. (2014) Capsaicin Cough Sensitivity and the Association with Clinical Parameters in Bronchiectasis. PLoS ONE 9(11): e113057. doi:10.1371/journal.pone.0113057

**Editor:** James D. Chalmers, University of Dundee, United Kingdom

**Received:** August 24, 2014; **Accepted:** October 18, 2014; **Published:** November 19, 2014

**Copyright:** © 2014 Guan et al. This is an open-access article distributed under the terms of the Creative Commons Attribution License, which permits unrestricted use, distribution, and reproduction in any medium, provided the original author and source are credited.

**Data Availability:** The authors confirm that all data underlying the findings are fully available without restriction. All relevant data are within the paper and its Supporting Information files.

**Funding:** This research was supported by the Changjiang Scholars and Innovative Research Team in University ITR0961, The National Key Technology R&D Program of the 12th National Five-year Development Plan 2012BAI05B01 and National Key Scientific & Technology Support Program: Collaborative innovation of Clinical Research for chronic obstructive pulmonary disease and lung cancer No. 2013BAI09B09 (to Profs. Zhong and Chen). The funders had no role in study design, data collection and analysis, decision to publish, or preparation of the manuscript.

**Competing Interests:** Profs. Zhong and Chen declare that they have received Changjiang Scholars and Innovative Research Team in University ITR0961, The National Key Technology R&D Program of the 12th National Five-year Development Plan 2012BAI05B01 and National Key Scientific & Technology Support Program: Collaborative innovation of Clinical Research for chronic obstructive pulmonary disease and lung cancer No. 2013BAI09B09. All other authors declared no potential conflict of interest. None of the funding sources had any role in the study. This does not alter the authors' adherence to PLOS ONE policies on sharing data and materials.

\* Email: nanshan@vip.163.com (NSZ); chenrc@vip.163.com (RCC)

† These authors contributed equally to this work.

## Introduction

Bronchiectasis is a debilitating disease in which the vicious cycle of airway infection, augmented inflammation and airway destruction is implicated [1,2]. Airways secretions and normal ciliary beats are crucial to maintain airway clearance in healthy subjects [3,4]. In bronchiectasis, these mechanisms are dampened by vicious cycles leading to mucus hypersecretion, which triggers

coughing for clearance [5]. Furthermore, persistently augmented cough response [6,7], which has now been recognized as chronic cough hypersensitivity syndrome [8,9], might be responsible for productive coughing. However, coughing has been associated with poorer quality of life and insomnia leading to distress and anxiety [10–13]. Elucidation of the association of cough and bronchiectasis may facilitate management of cough which is associated with improved quality of life.

The precise mechanisms and characteristics of cough remain poorly elucidated in bronchiectasis. Augmented cough reflex, heightened inflammatory markers (i.e. tachykinin, neurokinin) [14,15] and up-regulation of transient receptor potential vanilloid subfamily member 1 (TRPV1) could have accounted for chronic cough [14,16]. However, these measurements have been limited by the invasiveness of sampling (i.e. bronchoscopy) or the lack of well-established diagnostic significance. Clinically, cough reflex sensitivity could be assessed by cough symptom scores, cough frequency and capsaicin inhalation challenge. Because of high feasibility and validity, capsaicin inhalation challenge [6,7] has become a pivotal objective tool to identify cough hypersensitivity [17]. Characteristics of cough sensitivity in bronchiectasis have been thus far investigated in a single study. Torrego and colleagues [5] documented an increased sensitivity to capsaicin, as evidenced by lower levels of  $C_5$ , which in a linear model, correlated with Leicester Cough Questionnaire (LCQ) scores and FEV<sub>1</sub>. However, the relatively small sample size and lack of delineation of determinants of increased cough sensitivity have rendered the milieu of cough less clear in bronchiectasis. Further elucidation of the characteristics of cough in stable bronchiectasis may provide new insights into future management of cough.

We hypothesized that higher capsaicin cough responsiveness was associated with increased disease severity of bronchiectasis, in terms of more frequent bronchiectasis exacerbations, higher sputum purulence score, presence of cystic bronchiectasis, sputum culture positive for *Pseudomonas aeruginosa* (*P. aeruginosa*) and lower FEV<sub>1</sub>.

We sought to: 1) compare capsaicin cough responsiveness between bronchiectasis patients and healthy subjects; 2) determine the associations between capsaicin cough sensitivity and clinical parameters in terms of radiology, spirometry and sputum bacteriology; 3) explore the determinants of augmented capsaicin cough sensitivity.

## Methods

### Patients

Between September 2012 and November 2013, we performed a screening procedure in The First Affiliated Hospital of Guangzhou Medical University. Diagnosis of bronchiectasis was based on typical clinical symptoms (chronic coughing, sputum production, and/or hemoptysis), and chest high-resolution computed tomography (HRCT) within 12 months of recruitment at the out-patient respiratory clinics. Consecutive patients 18–75 years of age had to remain clinically stable for 4 weeks or more (no significant change in cough frequency or 24-hour sputum volume, no emerging fever, dyspnea or chest pain) [18]. We excluded patients with malignant tumor and those who had used antibiotics, antihistamine or oral corticosteroid, or upper respiratory tract infection within 4 weeks, or limited understanding. In patients with bronchiectasis, both never- and ex-smokers had no active contact with smoking for more than 1 year.

Healthy subjects were 18 to 75 years of age, free of respiratory or systemic diseases, had no upper respiratory tract infection for 4 weeks, and had normal chest radiograph and spirometry. The smoking status is displayed in Table 1.

The study protocol was approved by Ethics Committee of First Affiliated Hospital of Guangzhou Medical University. All subjects gave written informed consent.

### Study design

This was a single center, cross-sectional study. For bronchiectasis patients, meticulous history taking, Leicester cough Ques-

tionnaire (LCQ) [19,20] and cough symptom scoring, capsaicin cough provocation test, spirometry, spontaneous or induced sputum sampling, and sputum bacterial culture were performed. Healthy subjects underwent capsaicin cough provocation test and spirometry only.

### Capsaicin inhalation challenge

The methodology of capsaicin provocation test, by using dosimeter approach, has been introduced previously [5]. Briefly, subjects were instructed not to suppress cough or speak during the measurement. Capsaicin dilutions with doubling concentrations (1.95  $\mu\text{mol}$ ~1000  $\mu\text{mol}$ ) were delivered via Masterscreen (Output: 160  $\mu\text{l}/\text{min}$ ) and an automated APSpro system (Jaeger, Carefusion Co. Ltd, Hochberg, Germany). Subjects were not aware of the capsaicin concentrations throughout the measurement. Inhalation challenge using natural saline served as blank control. Repetitive inhalation challenges were performed at 1-min intervals, during which the number of coughs within the first 30 s was recorded. Inhalation challenge was ceased in case of 5 or more coughs, the corresponding capsaicin concentration ( $C_5$ ) was recorded. Similarly, the  $C_2$  was also documented. If less than 2 or 5 coughs were produced at the final step, 1000  $\mu\text{mol}/\text{L}$  was artificially assigned for  $C_2$  or  $C_5$ , respectively.

In this study, cough hypersensitivity denoted the  $C_5$  being 62.5  $\mu\text{mol}/\text{L}$  or less.

### Spirometry

Spirometry was conducted by using spirometers (QUARK PFT, COSMED Co. Ltd., Milan, Italy) in accordance with the *American Thoracic Society/European Respiratory Society* guideline [21]. Results were derived from at least 3 maneuvers, with between-maneuver variation of <5% or 200 ml in FVC and FEV<sub>1</sub>. Maximal FVC and FEV<sub>1</sub> were reported. Predicted values were recommended by Zheng and associates [22].

### Sputum sampling

The 24-hour sputum was assessed in 3 consecutive days. Patients were, following removal of contents in oral cavity, instructed to expectorate in 50 ml sterile transparent containers which were conveyed to the designated research nurse at the hospital visit. 24-hour sputum volume was trichotomised into 0–10 ml, 11–30 ml and >30 ml, respectively.

Fresh sputum was sampled during the hospital visit for bacterial culture. For subjects with insufficient sputum for analysis, induction using graded concentrations of hypertonic saline (3%, 5% and 7% when appropriate) was performed. Sputum induction for bacterial culture has been validated previously [23]. Qualified sputum sample, defined as leukocyte count >25 and squamous epithelial cell <10 per vision (magnified  $\times 100$ ), was selected. This entailed rapid transmission to microbiology laboratory (within 2 hours) for culture.

Sputum purulence as scored for 1, 2, 3, 4, 5, 6, 7 and 8 points corresponding to complete absence, almost translucent, half translucent, translucent but colorless, opaque and white, grey and green, moderately green and dark green, respectively [18].

### Sputum bacterial culture

Please refer to File S1.

### Cough symptom score

The severity of daytime and nighttime cough symptoms was scored by patients [5]. Daytime and night time scores were pooled

**Table 1.** Baseline levels.

|                                        | Parameter                              | Bronchiectasis (n = 135) | Healthy subjects (n = 22) | P value         |
|----------------------------------------|----------------------------------------|--------------------------|---------------------------|-----------------|
| <b>Demographics</b>                    | Age (yrs)                              | 44.7±13.7                | 38.1±13.2                 | <b>0.04</b>     |
|                                        | Height (cm)                            | 160.0 (10.0)             | 163.9±9.7                 | 0.15            |
|                                        | Weight (kg)                            | 52.0 (11.0)              | 62.8±10.5                 | <b>&lt;0.01</b> |
|                                        | BMI (kg/m <sup>2</sup> )               | 20.0 (4.0)               | 23.4±3.7                  | <b>&lt;0.01</b> |
|                                        | Females (No., %)                       | 83 (61.5%)               | 9 (40.9%)                 | 0.07            |
|                                        | Never-smokers (No., %)                 | 118 (87.4%)              | 15 (68.2%)                | <b>0.02</b>     |
| <b>Disease-related characteristics</b> | Duration of bronchiectasis (yrs)       | 10.0 (16.0)              | -                         | -               |
|                                        | No. of exacerbations within 2 years    | 3.0 (3.0)                | -                         | -               |
|                                        | No. of bronchiectatic lobes            | 4.0 (2.0)                | -                         | -               |
|                                        | HRCT total score                       | 7.0 (5.0)                | -                         | -               |
|                                        | 24-hour sputum volume (ml)             | 20.0 (25.0)              | -                         | -               |
|                                        | BSI                                    | 6.0 (7.0)                | -                         | -               |
| <b>Spirometry</b>                      | FVC pred%                              | 81.8 (26.0)              | 99.3±11.7                 | <b>&lt;0.01</b> |
|                                        | FEV <sub>1</sub> pred%                 | 70.8±23.2                | 99.9±11.9                 | <b>&lt;0.01</b> |
|                                        | FEV <sub>1</sub> /FVC (%)              | 75.7 (15.7)              | 84.0±6.4                  | <b>&lt;0.01</b> |
|                                        | MMEF pred%                             | 57.4±30.5                | 99.8±23.7                 | <b>&lt;0.01</b> |
| <b>Bronchiectasis etiology</b>         | Post-infectious (No., %)               | 37 (27.4%)               | -                         | -               |
|                                        | Immunodeficiency (No., %)              | 13 (9.5%)                | -                         | -               |
|                                        | Gastroesophageal reflux (No., %)       | 6 (4.4%)                 | -                         | -               |
|                                        | Other known etiologies* (No., %)       | 23 (17.0%)               | -                         | -               |
|                                        | Idiopathic (No., %)                    | 61 (45.2%)               | -                         | -               |
| <b>Sputum bacteriology</b>             | <i>Pseudomonas aeruginosa</i> (No., %) | 43 (31.9%)               | -                         | -               |
|                                        | Other PPMs** (No., %)                  | 38 (28.1%)               | -                         | -               |
|                                        | Commensals (No., %)                    | 54 (40.0%)               | -                         | -               |
| <b>Concomitant medications</b>         | Mucolytics (No., %)                    | 103 (76.3%)              | -                         | -               |
|                                        | Xanthenes (No., %)                     | 82 (60.7%)               | -                         | -               |
|                                        | Inhaled corticosteroids (No., %)       | 26 (19.3%)               | -                         | -               |
|                                        | Long-term macrolides (No., %)          | 36 (26.7%)               | -                         | -               |

Numerical data were presented as mean ± standard deviation for normal distribution or otherwise median (interquartile range). Categorical data were expressed as number (percentage) and compared with chi-square test.

PPM: potentially pathogenic microorganism

\* Other known etiologies encompassed asthma (n = 7, 5.2%), allergic bronchopulmonary aspergillosis (n = 2, 1.5%), Katargener's syndrome (n = 2, 1.5%), rheumatoid arthritis (n = 2, 1.5%), lung maldevelopment (n = 2, 1.5%), COPD (n = 1, 0.7%), Young's syndrome (n = 1, 0.7%), lung sequestration (n = 1, 0.7%), yellow nail syndrome (n = 1, 0.7%), aspergilloma (n = 1, 0.7%) and eosinophilic bronchiolitis (n = 1, 0.7%). The total number of these counts slightly exceeded that of the table because a minority of patients had dual etiologies.

\*\* Other pathogenic bacteria included *Hemophilus influenzae* (n = 12, 8.9%), *Hemophilus parainfluenzae* (n = 13, 9.6%), *Staphylococcus aureus* (n = 3, 2.2%), *Klebsiella pneumoniae* (n = 3, 2.2%), *Stenotrophobacter maltophilia* (n = 2, 1.5%), *Escherichia coli* (n = 1, 0.7%), *Klebsiella ozaenae* (n = 1, 0.7%), *Alcaligenes faecalis subsp faecalis* (n = 1, 0.7%), *Pseudomonas pseudoalcaligenes* (n = 1, 0.7%) and *Serratia marcescens* (n = 1, 0.7%).

Data in boldface indicated statistical significance.

No patient was on long-term oral or inhaled antibiotics.

doi:10.1371/journal.pone.0113057.t001

resulting in total cough symptom score, with a maximum of 10 points. (see Table S1 in File S1)

### Clinical assessments

The methodologies of bronchiectasis etiology assessments have been described previously [24–26], with slight modifications. Post-infectious bronchiectasis referred to the bronchiectasis symptoms that developed after any infectious diseases, including measles, tuberculosis, severe pneumonia, pertussis and other clinically significant diseases. Idiopathic bronchiectasis denoted the exclusion of any known causes.

The HRCT score was calculated on a lobar basis by using modified Reiff score, with lingular being a separate lobe, to assess

the morphology of bronchiectasis (0 for nil, 1 for tubular, 2 for varicose and 3 for cystic bronchiectasis, respectively) [24]. The maximal possible score was 18.

Bronchiectasis Severity Index (BSI) [27], a novel tool previously validated, was applied to determine the severity of bronchiectasis. The BSI was a composite of clinical parameters, including the age, body-mass index, prior exacerbations and prior hospitalization in the preceding year, Medical Research Council dyspnea score, FEV<sub>1</sub> predicted%, *P. aeruginosa* infection, colonization with other potentially pathogenic microorganisms (PPMs) and the number of bronchiectatic lobes. The cutoff values of BSI were ≤4, 5–8 and ≥9 for mild, moderate and severe bronchiectasis, respectively [27].

The LCQ, validated for use both in English and Chinese patients with bronchiectasis in previous studies [19,20] and the

study by our research group (Gao YH, et al. Validation of Chinese Leicester Cough Questionnaire in patients with bronchiectasis, article awaiting for publication in *International Journal of Tuberculosis and Lung Disease*), was a measure of quality of life. The LCQ consisted of 19 items divided in 3 domains, with a lower score indicating more significant impacts of cough on daily life. The lowest and highest possible total score was 0 and 21, respectively.

### Statistical analysis

Statistical analysis was performed using SPSS 16.0 version package (SPSS Inc., Chicago, IL, USA) and Graphpad Prism 5.0 (Graphpad Inc., San Diego, USA). Numerical data were presented as mean  $\pm$  standard deviation for normal distribution or otherwise median (interquartile range). Independent t-test or Mann-Whitney test was adopted for two-group comparisons as appropriate. Three-group comparisons were made using one-way analysis of variance or Kruskal-Wallis test as indicated. Categorical data were expressed as number (percentage) and compared with chi-square test. The correlation analysis was done using Spearman's model. The data of C<sub>2</sub> and C<sub>5</sub> were subjected to logarithmic transformation (with the base of 10) for further analyses. Determinants of increased cough sensitivity were identified using univariate Logistic regression analysis, data with P value of 0.10 or less were entered into multivariate regression model using backward selection algorithm. P<0.05 was deemed statistical significant for all analyses.

## Results

### Subject recruitment

See Figure 1.

### Baseline levels

Compared with healthy subjects, bronchiectasis patients had a higher mean age, and lower weight and BMI (all P<0.05). Markedly reduced spirometry was found in bronchiectasis patients (all P<0.01). Overall, our cohort represented patients with predominantly mild-to-moderate bronchiectasis (median BSI: 7.0). In terms of sputum bacteriology, commensals accounted for 40.0%, and the most common PPM was *P. aeruginosa* (31.9%, of whom 28.1% had chronic infection). The most common etiology was idiopathic (45.2%), followed by post-infectious (27.4%). Mucolytics (76.3%) and theophylline (60.7%) were the most frequently used concomitant medications. (Table 1)

### Capsaicin cough sensitivity in bronchiectasis patients vs. healthy subjects

There was an overlap in capsaicin cough sensitivity between healthy subjects and bronchiectasis patients. However, logarithms of C<sub>2</sub> and C<sub>5</sub> were significantly lower in bronchiectasis patients (all P<0.01), suggesting a higher magnitude of capsaicin cough sensitivity than healthy subjects. (Figures 2-A and 2-B)

### Capsaicin cough sensitivity of bronchiectasis patients when stratified by sex and disease duration

Compared with males, significantly lower levels of C<sub>2</sub> and C<sub>5</sub> (both P<0.01) were observed in female patients. However, the C<sub>2</sub> and C<sub>5</sub> were not associated with the disease duration. (Table 2)

### Capsaicin cough sensitivity and disease severity of bronchiectasis

Higher BSI and sputum culture positive for *P. aeruginosa* were associated with significantly lower levels of C<sub>2</sub> and C<sub>5</sub> (both P<0.05). Lower levels of C<sub>5</sub>, but not C<sub>2</sub>, were observed in patients with worse HRCT total score, increased sputum purulence score and higher 24-hour sputum volume (all P<0.05). However, FEV<sub>1</sub> being 50% predicted or less and presence of cystic bronchiectasis did not affect capsaicin cough sensitivity. (Table 2)

### Capsaicin cough sensitivity and Quality of life (QoL) indicators

Overall, capsaicin cough sensitivity yielded differences from QoL measures in their capacity of reflecting the disease severity. Higher capsaicin cough sensitivity (lower C<sub>2</sub> and C<sub>5</sub>) and poorer QoL (higher cough symptom score and/or lower LCQ total score) were consistently associated with higher BSI and sputum culture positive for *P. aeruginosa* (both P<0.05). The C<sub>5</sub>, but not C<sub>2</sub>, was a marker more closely correlated with cough symptom score and LCQ total score. Neither capsaicin cough sensitivity nor QoL measures could effectively differentiate patients with lower FEV<sub>1</sub>. (Table 2)

### Bronchiectasis with and without capsaicin cough hypersensitivity

Bronchiectasis patients with capsaicin cough hypersensitivity were associated with markedly lower body weight, BMI, FVCpred%, FEV<sub>1</sub>pred%, MMEFpred%, LCQ total score and the proportion of other PPMs, than their counterparts (all P<0.05). Furthermore, significantly higher proportion of females,

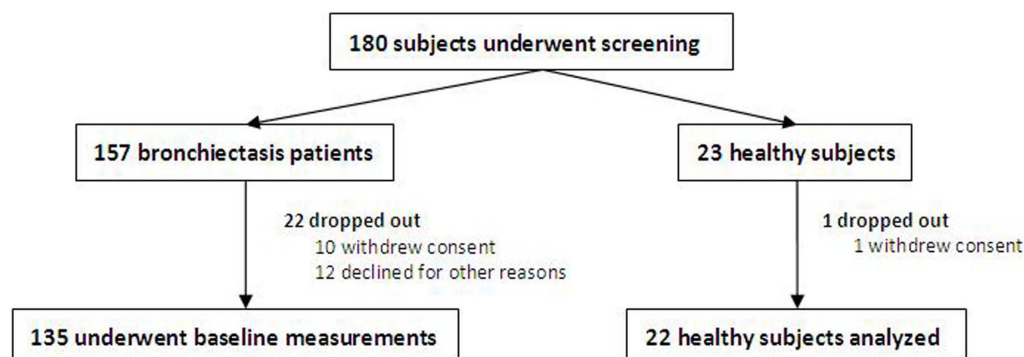

**Figure 1. Subject recruitment flowchart.** We screened 180 subjects (157 bronchiectasis patients and 23 healthy subjects). Of these, 22 bronchiectasis patients and 1 healthy subjects dropped out, and finally the data of 135 bronchiectasis patients and 22 healthy subjects were analyzed.

doi:10.1371/journal.pone.0113057.g001

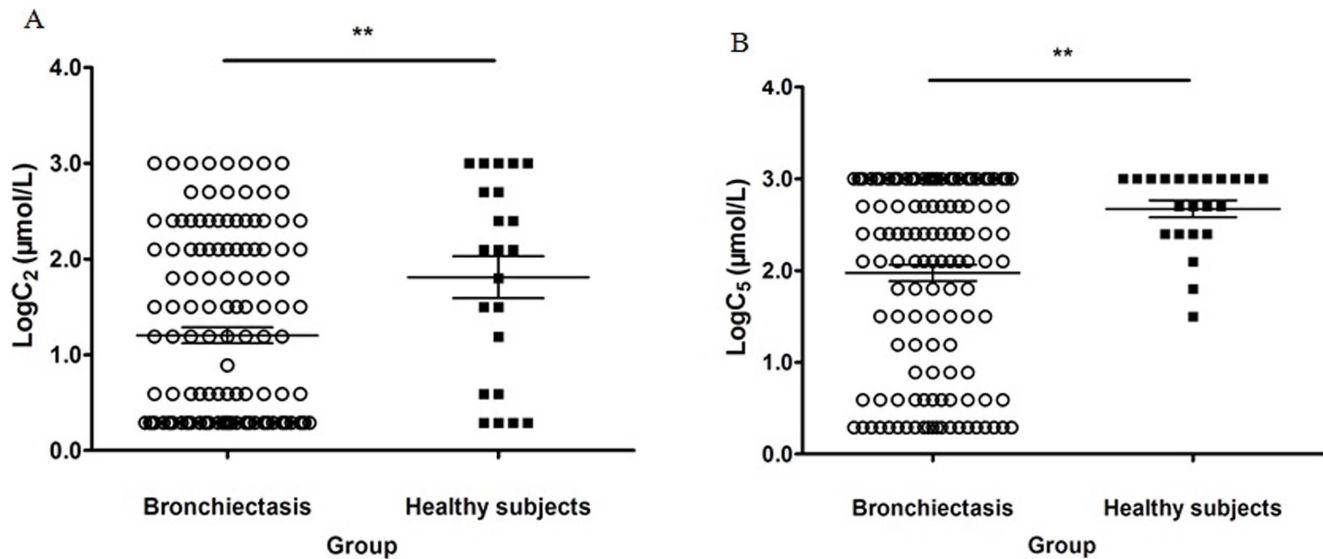

**Figure 2. Distribution of  $\text{Log}_{10}\text{C}_2$  and  $\text{Log}_{10}\text{C}_5$  in bronchiectasis patients and healthy subjects.** The capsaicin cough sensitivity, calculated as the capsaicin concentration causing at least 2 ( $\text{C}_2$ ) and 5 ( $\text{C}_5$ ), was compared between bronchiectasis patients and healthy subjects. Bronchiectasis patients yielded markedly lower levels of  $\text{C}_2$  and  $\text{C}_5$ , suggesting significantly higher capsaicin cough sensitivity than healthy subjects. The lines of the bar in each figure represented the 25% percentile, median and 75% percentile, respectively. Figure 2-A, distribution of  $\text{Log}_{10}\text{C}_2$ , Figure 2-B, Distribution of  $\text{Log}_{10}\text{C}_5$ . The asterisks in both Figures 2-A and 2-B denoted  $P < 0.01$ . doi:10.1371/journal.pone.0113057.g002

higher sputum purulence score, worse HRCT total score, BSI, cough symptom score and sputum culture positive for *P. aeruginosa* were observed in patients with augmented capsaicin cough sensitivity (all  $P < 0.05$ ). The differences in the age, height, duration of bronchiectasis, 24-hour sputum volume,  $\text{FEV}_1/\text{FVC}$  ratio, commensals present in sputum and the categories of bronchiectasis etiologies were unremarkable (all  $P > 0.05$ ). (Table 3)

### Univariate and multivariate analyses of capsaicin cough hypersensitivity

In univariate analysis, being females, the duration of cough between 5 and 10 years, HRCT total score being 7 or greater, BSI being 5 or greater, 24-hour sputum volume between 11 and 29 ml, cough symptom total score greater than 5 and sputum culture positive for *P. aeruginosa* (all  $P < 0.05$ ) were independently associated with capsaicin cough hypersensitivity, defined as the  $\text{C}_5$  being 62.5  $\mu\text{mol}$  or less. (see Table S2 in File S1)

In multivariate analysis, after adjusting for potential confounders, the final determinants encompassed female gender (OR: 3.25, 95%CI: 1.35–7.83,  $P < 0.01$ ), HRCT total score between 7 and 12 (OR: 2.57, 95%CI: 1.07–6.17,  $P = 0.04$ ), BSI between 5 and 8 (OR: 4.05, 95%CI: 1.48–11.06,  $P < 0.01$ ) and 9 or greater (OR: 4.38, 95%CI: 1.48–12.93,  $P < 0.01$ ). (Table 4)

## Discussion

### Principal findings

Our data demonstrated that  $\text{C}_2$  and  $\text{C}_5$  were significantly lower in bronchiectasis patients, despite that healthy subjects and bronchiectasis patients harbored a notable overlap in capsaicin cough sensitivity. Lower levels of  $\text{C}_5$  were associated with a longer duration of bronchiectasis symptoms, worse HRCT score, 24-hour sputum volume and BSI, higher sputum purulence score and sputum culture positive for *P. aeruginosa*. Patients with increased cough sensitivity had poorer clinical conditions, including higher BSI and HRCT score, than their counterparts. Determinants

associated with increased capsaicin cough sensitivity consisted of female gender, HRCT score between 7 and 12, and BSI of 5 or greater.

### Interpretations

The current study partially contradicted the findings by Torrego et al [5], which showed no association between cough sensitivity and the severity of bronchiectasis, the latter of which was referred to as  $\text{FEV}_1$  predicted and LCQ scores. This disparity could be interpreted by the different tools and methodologies employed. Indeed, the disease severity should be better assessed by using the age, gender, smoking history, sputum culture positive for *P. aeruginosa*, spirometry, radiological findings and the underlying etiology [28,29]. The BSI is a novel tool to determine future risks of hospitalizations, exacerbations, quality of life and mortality [27], which comprehensively comprised different sets of clinical parameters. Furthermore, our systematic analyses based on stratification of multiple parameters, including chest HRCT characteristics, sputum bacteriology and the previous history, might have increased the likelihood of unraveling these associations. The fact that patients with cough hypersensitivity were characterized by increased disease severity also reaffirmed our findings.

A notable clinical significance of our study was that capsaicin cough sensitivity was an indirect reflection of the disease severity of bronchiectasis and influenced by a battery of clinical parameters. Although the capsaicin cough sensitivity was not an ideal parameter for discrimination of bronchiectasis from healthy subjects, or identifying certain subgroups of bronchiectasis patients, it might be promising for the prospective follow-up and assessment of the therapeutic outcomes of cough. For instance, the efficacy of atorvastatin on bronchiectasis has recently been proven by using LCQ scores as a primary endpoint [30]. Our study warrants the use of capsaicin cough sensitivity as an objective parameter for assessment of cough in future clinical trials. Furthermore, early management of bronchiectasis via regular

**Table 2.** Comparison on capsaicin cough sensitivity, cough symptoms and quality of life in bronchiectasis.

| Parameter                               | Duration of bronchiectasis symptoms (yrs) |                |             |             | HRCT total score |             |                      |             | Sex         |             |       |
|-----------------------------------------|-------------------------------------------|----------------|-------------|-------------|------------------|-------------|----------------------|-------------|-------------|-------------|-------|
|                                         | <5                                        | 5-10           | >10         | P           | 1-6              | 7-13        | 14-18                | P           | Males       | Females     | P     |
| Log <sub>10</sub> C <sub>2</sub> (μmol) | 0.59 (1.81)                               | 0.59 (1.51)    | 1.19 (2.03) | 0.42        | 1.19 (2.03)      | 0.59 (1.81) | 0.59 (1.81)          | 0.83        | 1.65 (2.11) | 0.59 (1.36) | <0.01 |
| Log <sub>10</sub> C <sub>5</sub> (μmol) | 2.70 (1.20)                               | 1.95 (2.41)    | 2.40 (2.03) | 0.20        | 2.70 (0.90)      | 1.80 (2.41) | 1.60±0.97            | <b>0.01</b> | 2.70 (0.90) | 2.10 (2.26) | <0.01 |
| Cough symptom score                     | 2.00 (2.00)                               | 4.00 (2.00)    | 3.0 (3.00)  | <0.01       | 2.50 (2.00)      | 3.00 (2.00) | 4.87±2.10            | <0.01       | 3.00 (2.00) | 3.0 (2.00)  | 0.31  |
| LCQ total score                         | 14.80±3.60                                | 11.71±3.28     | 12.09±4.17  | <0.01       | 13.74±3.78       | 11.90±3.76  | 10.52±3.24           | <0.01       | 12.76±3.53  | 12.56±4.08  | 0.73  |
| <b>Sputum purulence score</b>           |                                           |                |             |             |                  |             |                      |             |             |             |       |
|                                         | ≤2                                        | 3-5            | 6-7         | P           | ≤10              | 11-30       | >30                  | P           | >50%        | ≤50%        | P     |
| Log <sub>10</sub> C <sub>2</sub> (μmol) | 0.59 (2.26)                               | 1.65 (2.11)    | 0.59 (1.81) | 0.11        | 0.59 (1.81)      | 0.59 (1.73) | 1.00 (2.11)          | 0.59        | 1.19 (1.81) | 0.59 (1.88) | 0.91  |
| Log <sub>10</sub> C <sub>5</sub> (μmol) | 2.70 (1.95)                               | 3.00 (0.97)    | 2.93 (2.33) | <0.01       | 2.55 (1.50)      | 2.40 (2.11) | 1.50 (1.81)          | <b>0.04</b> | 2.40 (1.81) | 1.69±1.04   | 0.15  |
| Cough symptom score                     | 2.08±0.49                                 | 2.52±0.30      | 3.00 (2.00) | <0.01       | 2.00 (2.00)      | 3.00 (2.00) | 4.00 (2.00)          | <0.01       | 3.00 (2.00) | 3.50 (3.00) | 0.07  |
| LCQ total score                         | 12.43±1.40                                | 14.83±0.77     | 12.01±0.35  | <0.01       | 14.06±4.10       | 12.42±3.16  | 10.60±3.54           | <0.01       | 12.86±3.81  | 11.74±4.05  | 0.17  |
| <b>BSI</b>                              |                                           |                |             |             |                  |             |                      |             |             |             |       |
|                                         | Mild (0-4)                                | Moderate (5-8) | Severe (≥9) | P           | Commensals       | Other PPMs  | <i>P. aeruginosa</i> | P           | Nil         | Yes         | P     |
| Log <sub>10</sub> C <sub>2</sub> (μmol) | 1.50 (2.11)                               | 0.44 (1.51)    | 0.59 (1.66) | <b>0.03</b> | 1.19 (2.11)      | 0.92 (2.03) | 0.44 (0.98)          | <b>0.02</b> | 0.59 (1.88) | 0.59 (1.81) | 0.80  |
| Log <sub>10</sub> C <sub>5</sub> (μmol) | 2.70 (0.90)                               | 2.10 (2.41)    | 1.50 (1.81) | <0.01       | 2.70 (1.66)      | 2.40 (1.30) | 1.19 (1.88)          | <0.01       | 2.70 (2.41) | 2.10 (1.81) | 0.13  |
| Cough symptom score                     | 2.00 (2.00)                               | 3.00 (2.00)    | 4.00 (2.00) | <0.01       | 3.00 (2.00)      | 3.00 (2.00) | 4.00 (2.00)          | <b>0.01</b> | 3.00 (2.00) | 3.00 (3.00) | <0.01 |
| LCQ total score                         | 13.46±4.03                                | 12.83±2.26     | 11.18±4.08  | <b>0.02</b> | 13.57±4.26       | 12.61±3.56  | 11.48±3.33           | <b>0.03</b> | 13.18±3.89  | 12.21±3.81  | 0.16  |
| <b>Sputum bacteriology</b>              |                                           |                |             |             |                  |             |                      |             |             |             |       |
| <b>Cystic bronchiectasis</b>            |                                           |                |             |             |                  |             |                      |             |             |             |       |

Numerical data were presented as mean ± standard deviation for normal distribution or otherwise median (interquartile range). Categorical data were expressed as number (percentage) and compared with chi-square test.

PPM: potentially pathogenic microorganism.

Data in boldface indicated statistical significance.

doi:10.1371/journal.pone.0113057.t002

**Table 3.** Comparison on clinical characteristics of bronchiectasis patients with and without capsaicin cough hypersensitivity.

|                                        | Parameter                                     | Cough hypersensitivity (n = 52) | Normal cough sensitivity (n = 83) | P value         |
|----------------------------------------|-----------------------------------------------|---------------------------------|-----------------------------------|-----------------|
| <b>Demographics</b>                    | <b>Age (yrs)</b>                              | 45.4±15.3                       | 44.2±12.7                         | 0.62            |
|                                        | <b>Height (cm)</b>                            | 160.0±7.2                       | 162.2±7.6                         | 0.09            |
|                                        | <b>Weight (kg)</b>                            | 49.0 (8.2)                      | 54.0 (11.5)                       | <b>&lt;0.01</b> |
|                                        | <b>BMI (kg/m<sup>2</sup>)</b>                 | 19.4±2.6                        | 21.1±3.2                          | <b>&lt;0.01</b> |
|                                        | <b>Females (No., %)</b>                       | 41 (78.8%)                      | 42 (50.6%)                        | <b>&lt;0.01</b> |
| <b>Disease-related characteristics</b> | <b>Duration of bronchiectasis (yrs)</b>       | 10.0 (15.0)                     | 10.0 (17.0)                       | 0.70            |
|                                        | <b>No. of bronchiectatic lobes</b>            | 4.0 (3.0)                       | 3.0 (3.0)                         | <b>&lt;0.01</b> |
|                                        | <b>HRCT total score</b>                       | 8.0 (6.0)                       | 5.0 (6.0)                         | <b>&lt;0.01</b> |
|                                        | <b>24-hour sputum volume (ml)</b>             | 20.0 (45.0)                     | 15.0 (20.0)                       | 0.07            |
|                                        | <b>BSI</b>                                    | 7.4±3.5                         | 5.0 (6.0)                         | <b>&lt;0.01</b> |
|                                        | <b>Sputum purulence score</b>                 | 6.0 (1.0)                       | 6.0 (2.0)                         | <b>0.02</b>     |
| <b>Spirometry</b>                      | <b>FVC pred%</b>                              | 71.9±19.8                       | 83.3±18.6                         | <b>&lt;0.01</b> |
|                                        | <b>FEV<sub>1</sub> pred%</b>                  | 62.7±22.0                       | 75.9±22.7                         | <b>&lt;0.01</b> |
|                                        | <b>FEV<sub>1</sub>/FVC (%)</b>                | 71.4±13.2                       | 76.8 (15.2)                       | 0.12            |
|                                        | <b>MMEF pred%</b>                             | 48.6±27.8                       | 63.0±31.0                         | <b>&lt;0.01</b> |
| <b>Cough-related parameters</b>        | <b>Cough symptom score</b>                    | 4.0 (2.0)                       | 3.0 (2.0)                         | <b>&lt;0.01</b> |
|                                        | <b>LCQ total score</b>                        | 11.7±3.9                        | 13.2±3.7                          | <b>0.03</b>     |
| <b>Bronchiectasis etiology</b>         | <b>Post-infectious (No., %)</b>               | 14 (26.9%)                      | 23 (27.7%)                        | 0.58            |
|                                        | <b>Immunodeficiency (No., %)</b>              | 7 (13.5%)                       | 6 (7.2%)                          | 0.23            |
|                                        | <b>Gastroesophageal reflux (No., %)</b>       | 2 (3.8%)                        | 4 (4.8%)                          | 0.87            |
|                                        | <b>Other known etiologies (No., %)</b>        | 7 (13.5%)                       | 15 (18.1%)                        | 0.48            |
|                                        | <b>Idiopathic (No., %)</b>                    | 24 (46.2%)                      | 27 (32.5%)                        | 0.11            |
| <b>Sputum bacteriology</b>             | <b><i>Pseudomonas aeruginosa</i> (No., %)</b> | 27 (51.9%)                      | 16 (19.3%)                        | <b>&lt;0.01</b> |
|                                        | <b>Other PPMs (No., %)</b>                    | 9 (17.3%)                       | 29 (34.9%)                        | <b>0.03</b>     |
|                                        | <b>Commensals (No., %)</b>                    | 16 (30.8%)                      | 38 (45.8%)                        | 0.08            |

Numerical data were presented as mean ± standard deviation for normal distribution or otherwise median (interquartile range). Categorical data were expressed as number (percentage) and compared with chi-square test.

PPM: potentially pathogenic microorganism.

A minority of patients had dual etiologies, therefore the sum of proportion of individual etiologies was greater than 100%.

Data in boldface indicated statistical significance.

doi:10.1371/journal.pone.0113057.t003

pharmacological intervention (i.e. mucolytics and bronchodilators for airway clearance, antibiotics for suppressing *P. aeruginosa* growth) may be associated with reduced likelihood of having persistent severe cough and disrupted daily life. Understanding of the mechanisms and characteristics of cough in bronchiectasis is expected to facilitate the development of such medications.

The exact mechanisms underlying varying responses to capsaicin challenge remain unknown, but could be related to the different magnitude of airway inflammation, airway destruction, characters of coughing (dry vs. wet cough), psychological status and inter-individual variability. Furthermore, the heterogeneous underlying causes of bronchiectasis might have contributed significantly to the observed differences in capsaicin cough sensitivity.

More importantly, we have disclosed that determinants associated with increased capsaicin cough sensitivity encompassed female gender, HRCT score between 7 and 12, and BSI of 5 or greater. Although our cohort was predominated by females, we found that a greater proportion of females harbored the *bona fide* cough hypersensitivity, which was in concert with literature reports [31]. The worse HRCT total score and higher BSI have been

associated with cough hypersensitivity, further reaffirming that cough sensitivity mirrored the disease severity of bronchiectasis.

The most interesting finding was that the 24-hour sputum volume, FEV<sub>1</sub> predicted% and cystic bronchiectasis did not accurately predict cough sensitivity. A possible interpretation could be that capsaicin cough sensitivity was solely related to upper airway sensory nerve (esp. C-fibers) sensitivity. Or it could be that miscellaneous clinical parameters have masked their underlying effects. Despite that sputum purulence or color has been suggested as a better indicator of cough sensitivity, since these parameters have been associated with the severity of inflammation, airway destruction and proteolytic activity [32], our data failed to confirm this finding. Moreover, although antitussives are not recommended for suppressing cough in bronchiectasis, treatments specifically targeting at alleviating severe cough and antagonizing cough-related inflammatory mediators may be promising alternatives. However, it should be recognized that our definition of cough hypersensitivity with C<sub>5</sub> alone might have biased the findings. However, before miscellaneous endpoints are further validated, the C<sub>5</sub> remains an optimal parameter for assessments.

**Table 4.** Multivariate analysis of the determinants of capsaicin cough hypersensitivity.

| Variables               | C5≤62.5 μmol (No., %) | C5>62.5 μmol (No., %) | Multivariable regression model |                   |                 |
|-------------------------|-----------------------|-----------------------|--------------------------------|-------------------|-----------------|
|                         |                       |                       | OR                             | 95%CI             | P               |
| <b>Sex</b>              |                       |                       |                                |                   |                 |
| Male                    | 11 (21.2)             | 41 (49.4%)            | -                              | Reference         | -               |
| Female                  | <b>41 (78.8%)</b>     | <b>42 (50.6%)</b>     | <b>3.25</b>                    | <b>1.35-7.83</b>  | <b>&lt;0.01</b> |
| <b>HRCT total score</b> |                       |                       |                                |                   |                 |
| ≤6                      | 16 (30.8%)            | 50 (60.2%)            | -                              | Reference         | -               |
| 7-12                    | <b>28 (53.8%)</b>     | <b>26 (31.3%)</b>     | <b>2.57</b>                    | <b>1.07-6.17</b>  | <b>0.04</b>     |
| ≥13                     | <b>8 (15.4%)</b>      | <b>7 (8.4%)</b>       | <b>2.32</b>                    | <b>0.66-8.17</b>  | <b>0.19</b>     |
| <b>BSI</b>              |                       |                       |                                |                   |                 |
| 0-4                     | 11 (21.2%)            | 41 (49.4%)            | -                              | Reference         | -               |
| 5-8                     | 24 (46.2%)            | 25 (30.1%)            | 4.05                           | 1.48-11.06        | <0.01           |
| ≥9                      | <b>17 (32.7%)</b>     | <b>17 (20.5%)</b>     | <b>4.38</b>                    | <b>1.48-12.93</b> | <b>&lt;0.01</b> |

Categorical data were expressed as number (percentage) and compared with chi-square test.

Data in boldface indicated statistical significance.

In multivariate analysis, settings of the covariates were as follows: Sex: 0 for female, 1 for males; duration of cough: 0 for less than 5 years, 1 for 5 to 10 years, 2 for greater than 10 years; HRCT score: 0 for 6 or less, 1 for greater than 7 and less than 13, 2 for 13 or greater; bronchiectasis severity index: 0 for 4 or less, 1 for 5 to 8, 2 for 9 or greater; 24-hour sputum volume: 0 for 10 ml or less, 1 for greater than 10 and less than 30 ml, 2 for 30 ml or greater; cough symptom score: 0 for 5 or less, 1 for greater than 5; sputum bacteriology: 0 for commensals, 1 for *Pseudomonas aeruginosa*, 2 for other PPMs.

doi:10.1371/journal.pone.0113057.t004

## Strengths and limitations

Strengths of our study comprised the relatively large sample size, systematic comparison of cough sensitivity stratified by various clinical parameters, delineation of the characteristics of patients with different cough sensitivities and the identification of determinants of cough hypersensitivity.

Some demerits must be underlined. First, this was not large-scale prospective study investigating the utility of capsaicin cough sensitivity to predict the prognosis of bronchiectasis. Second, our healthy subject cohort and bronchiectasis patients were not matched for age and sex. Third, cough symptoms and severity lacked gold standards, i.e. 24-hour ambulatory cough monitoring. However, such measurements would be less cost-effective for screening. Fourth, it would be more ideal to apply capsaicin cough challenge test in individual or prospective studies. Fifth, miscellaneous inflammatory biomarkers (i.e. neutrophil elastase and matrix metalloproteinase) [33] were not assayed in the current study. However, since this was not a mechanistic study, we were unable to extrapolate to the mechanisms underlying patients with cough hypersensitivity. Furthermore, the imbalanced proportion of never-smokers in healthy subjects and bronchiectasis patients might help interpret the significant overlap in capsaicin cough sensitivity. Finally, our dosimeter used to administer capsaicin was not limited for constant inspiratory flow.

## Conclusion

We have further validated capsaicin cough challenge test in bronchiectasis. Capsaicin cough sensitivity is heightened in a subgroup of bronchiectasis patients and associated with the disease severity. Gender and disease severity are independent determinants. Despite that current testing for cough sensitivity may be limited because of the overlap with healthy subjects, our findings may provoke further studies that might improve quality of life via amelioration of cough hypersensitivity. Capsaicin challenge test has been added as a tool in bronchiectasis and has potential use in future studies to assess objective improvement in cough hypersensitivity.

## Supporting Information

**File S1 Supporting Information.** Table S1, Cough symptom scores. Table S2, Univariate analysis of the determinants of capsaicin cough hypersensitivity. Categorical data were expressed as number (percentage) and compared with chi-square test. Data in boldface indicated statistical significance. In multivariate analysis, settings of the covariates were as follows. Sex: 0 for female, 1 for males; duration of cough: 0 for less than 5 years, 1 for 5 to 10 years, 2 for greater than 10 years; HRCT score: 0 for 6 or less, 1 for greater than 7 and less than 13, 2 for 13 or greater; bronchiectasis severity index: 0 for 4 or less, 1 for 5 to 8, 2 for 9 or greater; 24-hour sputum volume: 0 for 10 ml or less, 1 for greater than 10 and less than 30 ml, 2 for 30 ml or greater; cough symptom score: 0 for 5 or less, 1 for greater than 5; sputum bacteriology: 0 for commensals, 1 for *Pseudomonas aeruginosa*, 2 for other PPMs.

(DOC)

## Acknowledgments

We thank Prof. Surinder Biring (King's College London, UK) for permission of use of LCQ. We also wholeheartedly thank Profs. Ke-fang Lai and Wei Luo (State Key Laboratory of Respiratory Disease, National Clinical Research center for Respiratory Disease, Guangzhou Institute of Respiratory Disease, First Affiliated Hospital of Guangzhou Medical University, Guangzhou Medical University), as well as Prof. Kenneth Wah-Tak Tsang and June Sun (LKS Faculty of Medicine, Hong Kong SAR, China) for their assistance and recommendations.

## Author Contributions

Conceived and designed the experiments: WJG YHG GX RCC NSZ. Performed the experiments: WJG YHG GX HML ZYL YT JPZ. Analyzed the data: WJG YHG GX. Contributed reagents/materials/analysis tools: WJG YHG GX HML ZYL ZML. Wrote the paper: WJG YHG GX. Provided critical review of the manuscript: RCC NSZ. Approved the final submission: RCC NSZ.



## References

- Baker AF (2002) Bronchiectasis. *N Engl J Med* 346: 1383–93
- Tsang KW, Bilton D (2009) Clinical challenges in managing bronchiectasis. *Respirology* 14: 637–50
- Ho JC, Chan KN, Hu WH, Lam WK, Zheng L, et al (2001) The effect of aging on nasal mucociliary clearance, beat frequency, and ultrastructure of respiratory cilia. *Am J Respir Crit Care Med* 163: 983–8
- Tsang KW, Zheng L, Tipoe G (2000) Ciliary assessment in bronchiectasis. *Respirology* 5: 91–8
- Torrego A, Haque RA, Nguyen LT, Nguyen LT, Hew M, et al (2006) Capsaicin cough sensitivity in bronchiectasis. *Thorax* 61: 706–9
- Couto M, de Diego A, Perpini M, Delgado L, Moreira A (2013) Cough reflex testing with inhaled capsaicin and TRPV1 activation in asthma and comorbid conditions. *J Investig Allergol Clin Immunol* 23: 289–301
- Hilton EC, Baverel PG, Woodcock A, Van Der Graaf PH, Smith JA (2013) Pharmacodynamic modeling of cough responses to capsaicin inhalation calls into question the utility of the C5 endpoint. *J Allergy Clin Immunol* 132: 847–55
- Morice AH (2013) Chronic cough hypersensitivity syndrome. *Cough* 9: 14
- Song WJ, Chang YS, Morice AH (2014) Changing the paradigm for cough: does 'cough hypersensitivity' aid our understanding? *Asia Pac Allergy* 4: 3–13
- Klink ME, Dodge R, Quan SF (1994) The relation of sleep complaints to respiratory symptoms in a general population. *Chest* 105: 151–4
- Chan KK, Ing AJ, Laks L, Cossa G, Rogers P, et al (2010) Chronic cough in patients with sleep-disordered breathing. *Eur Respir J* 35: 368–372
- Milross MA, Piper AJ, Norman M, Dobbins CJ, Grunstein RR, et al (2002) Subjective sleep quality in cystic fibrosis. *Sleep Med* 3: 205–212
- Olveira C, Olveira G, Gaspar I, Dorado A, Cruz J, et al (2013) Depression and anxiety symptoms in bronchiectasis: associations with health-related quality of life. *Qual Life Res* 22: 597–605
- Lee LY, Ni D, Hayes D Jr, Lin RL (2011) TRPV1 as a cough sensor and its temperature-sensitive properties. *Pulm Pharmacol Ther* 3: 280–5
- Park HK, Oh SY, Kim TB, Bahn JW, Shin ES, et al (2006) Association of genetic variations in neurokinin-2 receptor with enhanced cough sensitivity to capsaicin in chronic cough. *Thorax* 12: 1070–5
- Bessac BF, Jordit SE (2008) Breathtaking TRP channels: TRPA1 and TRPV1 in airway chemosensation and reflex control. *Physiology (Bethesda)* 23: 360–70
- Chung KF (2011) Chronic "cough hypersensitivity syndrome": a more precise label for chronic cough. *Pulm Pharmacol Ther* 24: 267–71
- Tsang KW, Chan KN, Ho PL, Zheng L, Ooi GC, et al (2000) Sputum Elastase in Steady-state Bronchiectasis. *Chest* 117: 420–6
- Murray MP, Turnbull K, MacQuarrie S, Pentland JL, Hill AT (2009) Validation of the Leicester Cough Questionnaire in non-cystic fibrosis bronchiectasis. *Eur Respir J* 34: 125–31
- Ma W, Yu L, Wang Y, Li X, Lu H, Qiu Z (2009) Changes in health-related quality of life and clinical implications in Chinese patients with chronic cough. *Cough* 25: 5–7
- Laszlo G (2005) ATS/ERS task force: Standardization of spirometry. *Eur Respir J* 26: 319–38
- Zheng JP, Zhong NS (2002) Normative values of pulmonary function testing in Chinese adults. *Chin Med J* 115: 50–4
- Tunney MM, Einarsson GG, Wei L, Drain M, Klem ER, et al (2013) Lung microbiota and bacterial abundance in patients with bronchiectasis when clinically stable and during exacerbation. *Am J Respir Crit Care Med* 187: 1118–26
- Pasteur MC, Helliwell SM, Houghton SJ, Webb SC, Foweraker JE, et al (2000) An Investigation into Causative Factors in Patients with Bronchiectasis. *Am J Respir Crit Care Med* 162: 1277–84
- Anwar GA, McDonnell MJ, Worthy SA, Bourke SC, Afolabi G, et al (2013) Phenotyping adults with non-cystic fibrosis bronchiectasis: A prospective observational cohort study. *Respir Med* 107: 1001–7
- Pasteur MC, Bilton D, Hill AT, on behalf of the British Thoracic Society Bronchiectasis (non-CF) Guideline Group (2010) British Thoracic Society guidelines for non-CF bronchiectasis. *Thorax* 65: i1–i58
- Chalmers JD, Goeminne P, Aliberti S, McDonnell MJ, Lonni S, et al (2014) The bronchiectasis severity index: An international derivation and validation study. *Am J Respir Crit Care Med* 189: 576–75
- Loebinger MR, Wells AU, Hansell DM, Chinyanganya N, Devaraj A, et al (2009) Mortality in bronchiectasis: a long-term study assessing the factors influencing survival. *Eur Respir J* 34: 843–9
- Goeminne PC, Nawrot TS, Ruttens D, Seys S, Dupont LJ (2014) Mortality in non-cystic fibrosis bronchiectasis: a prospective cohort analysis. *Respir Med* 108: 287–96
- Mandal P, Chalmers JD, Graham C, Harley C, Sidhu MK, et al (2014) Atorvastatin as a stable treatment in bronchiectasis: a randomised controlled study. *Lancet Respir Med* 2: 455–63
- Varechova S, Plevkova J, Hanacek J, Tatar M (2008) Role of gender and pubertal stage on cough sensitivity in childhood and adolescence. *J Physiol Pharmacol* 59: 719–26
- Goeminne PC, Vandoooren J, Moelants EA, Decraene A, Rabaey E, et al (2014) The sputum color chart as a predictor of lung inflammation, proteolytics and damage in non-cystic fibrosis bronchiectasis: a case-control analysis. *Respirology* 19: 203–10
- Chalmers JD, Hill AT (2013) Mechanisms of immune dysfunction and bacterial persistence in non-cystic fibrosis bronchiectasis. *Mol Immunol* 55: 27–34.
